# Supplementary material for: High specificity and tight spatial restriction of self-biotinylation by DNA and RNA G-Quadruplexes complexed in vitro and in vivo with Heme
Source: PubMed Central journal article supplement (PMC7261162; doi:10.1093/nar/gkaa281), 2020-04-24
Supplement: gkaa281_supplemental_file.pdf [file gkaa281_supplemental_file.pdf]

March 24, 2020

**High Specificity and High Spatial Restriction of Self-Biotinylation by  
DNA and RNA G-Quadruplexes Complexed with Heme.**

Prince Kumar Lat<sup>1</sup>, Kun Liu<sup>2</sup>, Dev Nandan Kumar<sup>1</sup>, Kenneth K. L. Wong<sup>1</sup>, Esther M.

Verheyen<sup>1</sup>, and Dipankar Sen<sup>1,2\*</sup>

<sup>1</sup>Dept. of Molecular Biology and Biochemistry and <sup>2</sup>Dept. of Chemistry,

Simon Fraser University, Burnaby, British Columbia V5A 1S6, Canada

**SUPPORTING INFORMATION**

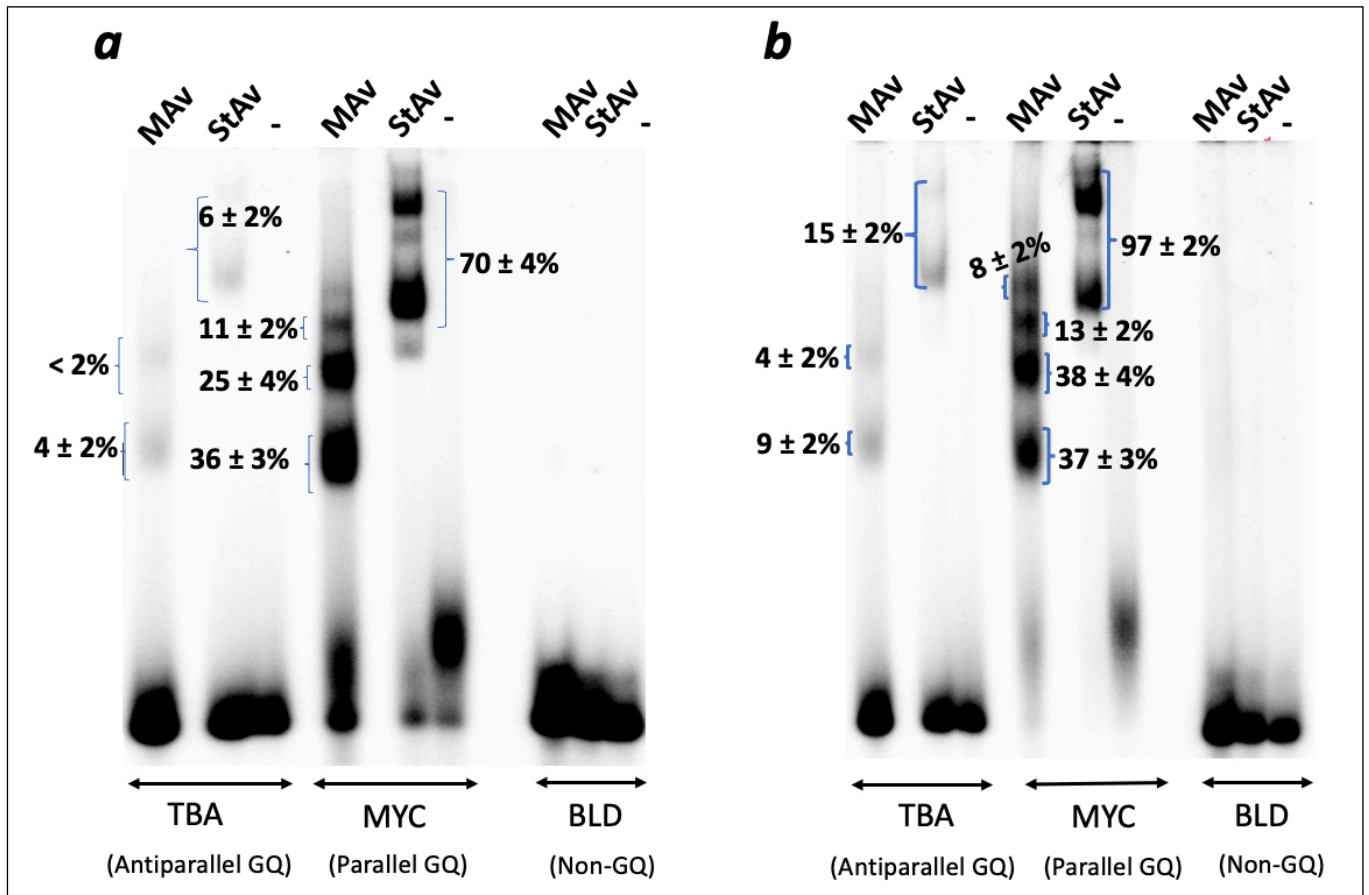

**Supporting Figure S1:** The consistency of GQ biotinylation levels in two independent experiments using the standard 5  $\mu$ M heme (panel *a*) and of biotinylation with a higher (50  $\mu$ M) heme concentration (panel *b*). For each of the above, two independent experiments were carried out and the error bars represent deviations from the mean. “MAV” refers to monoavidin, and “StAv” streptavidin. “-” above a gel lane indicates that neither streptavidin or monoavidin had been added to that DNA sample.

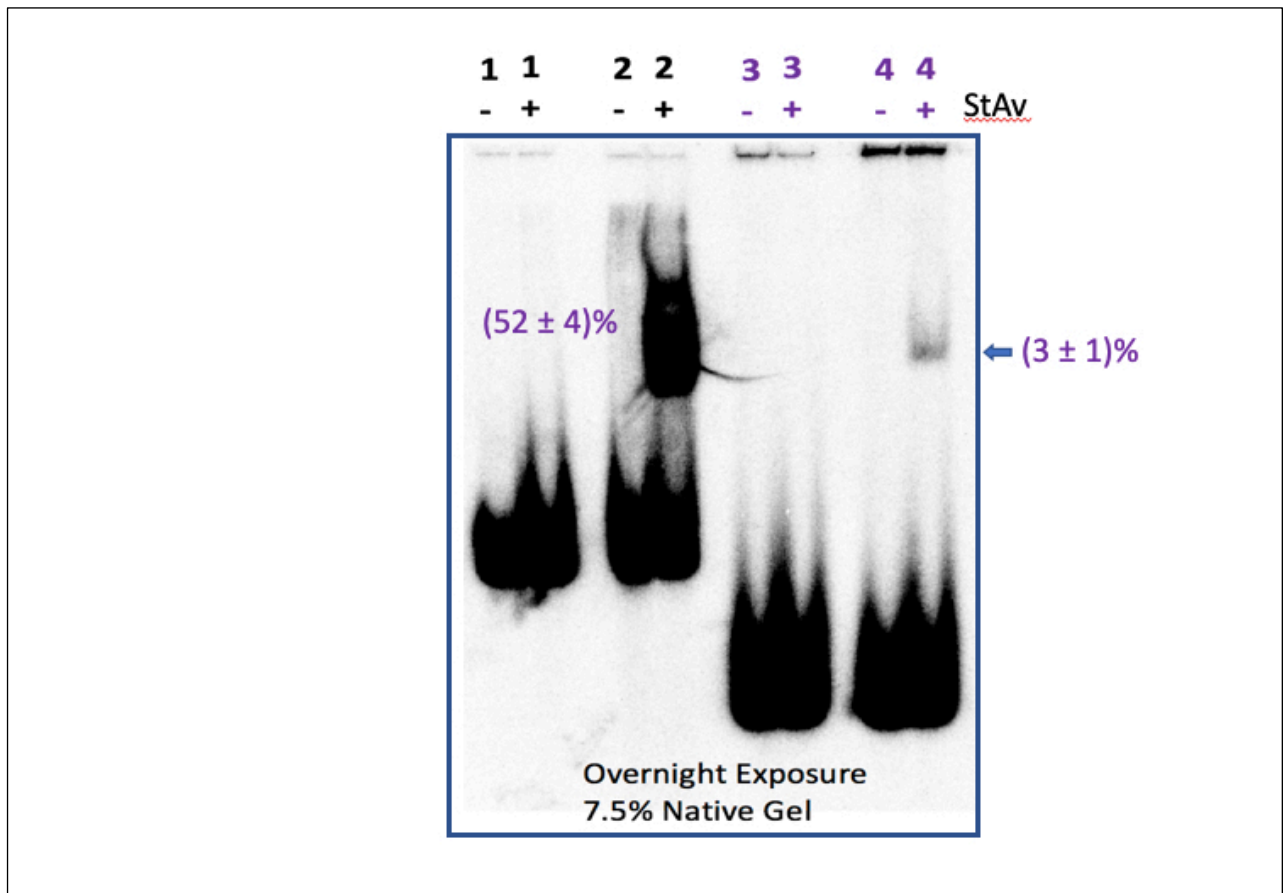

**Supporting Figure S2:** A longer exposure of the gel shown in **Figure 5 b**.

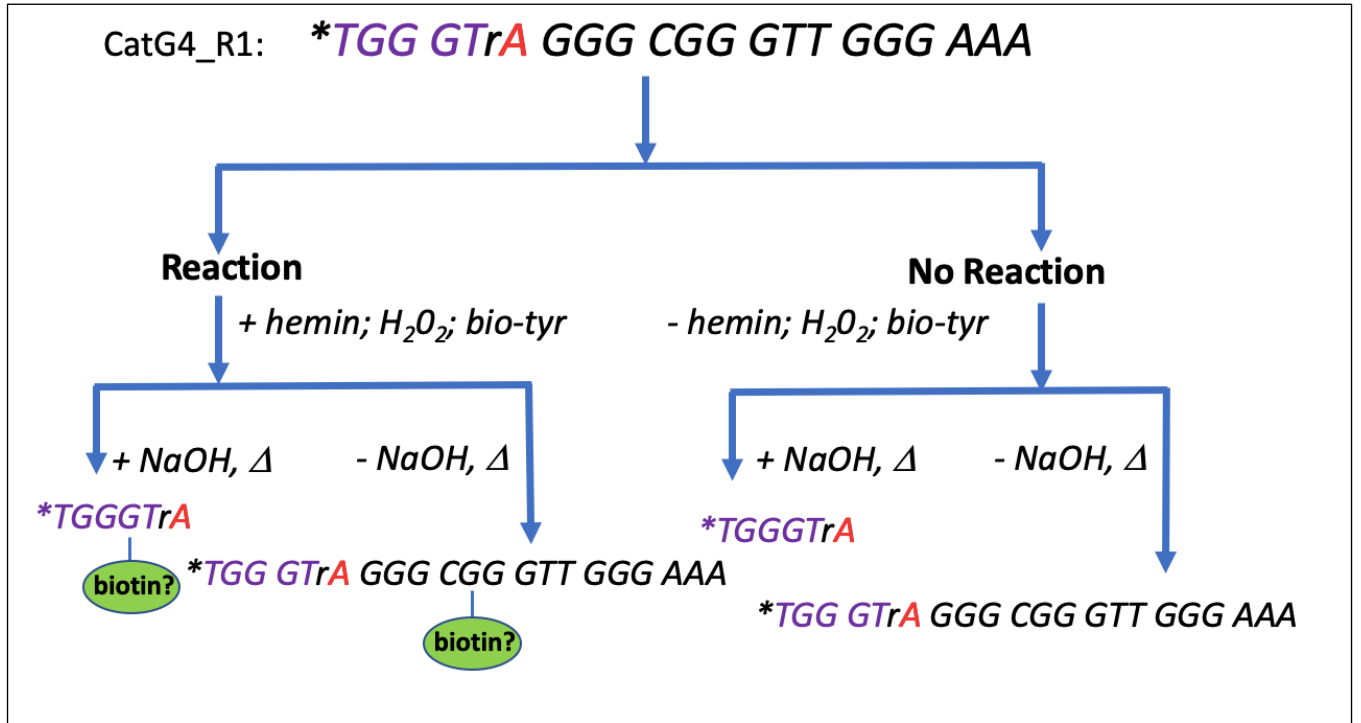

**Supporting Figure S3:** Schematic showing the experimental approach to determining the distribution of appended biotins in the GQ formed by "CatG4".

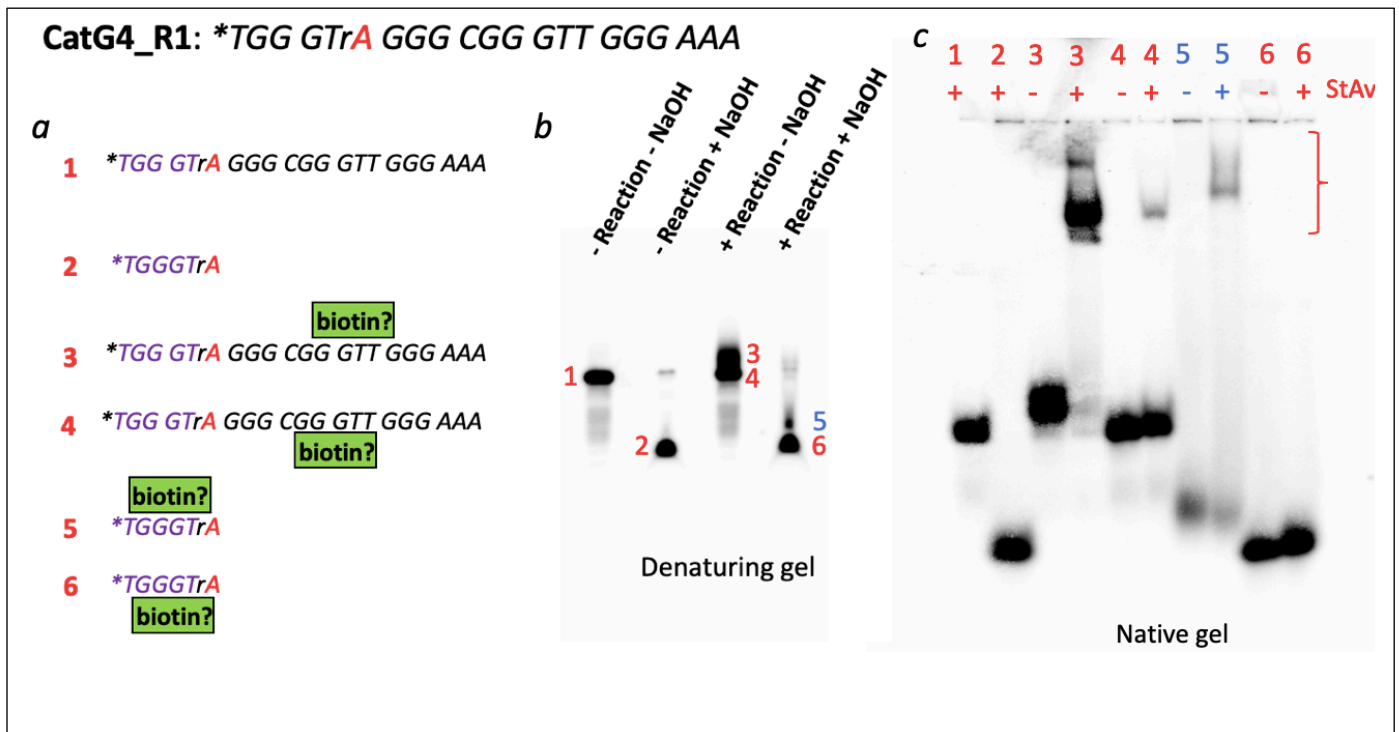

**Supporting Figure S4:** Determination of the extent of biotinylation within two component pieces (sequences 1 and 2 shown in *a*) of the oligonucleotide “G4\_R1” (or CatG4\_R1). *b*: A denaturing gel showing G4\_R1 treated with hemin, BT, and H<sub>2</sub>O<sub>2</sub> (“Reaction”) or not treated, either cleaved in two by heating with NaOH (or not). The six <sup>32</sup>P-labeled fragments, 1-6, were purified, and then mixed with soluble streptavidin (StAv). These were then run on a native gel (*c*). The red bracket in *c* shows the streptavidin-retarded bands.

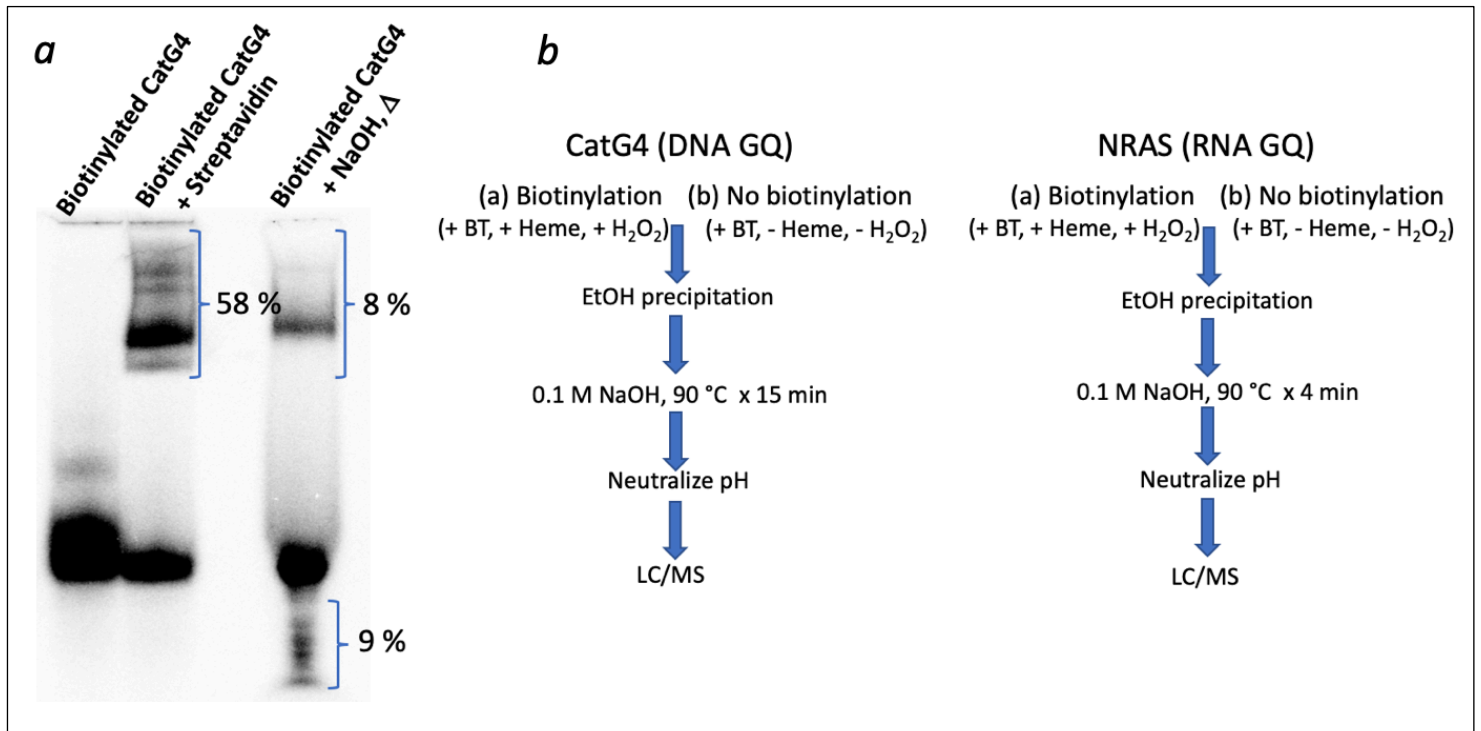

**Supporting Figure S5 a:** Effect of 0.1 M NaOH and heating upon the biotinylated GQ, CatG4. Shown is a 7.5% native (non-denaturing) gel, whose first two lanes on the left show, respectively, biotinylated CatG4 (generated by the standard heme/H<sub>2</sub>O<sub>2</sub>/biotin-tyramide reaction) without and with streptavidin added prior to loading in the gel. From the second lane, it can be seen that 58% of the DNA has been biotinylated (retarded by streptavidin binding). Treatment with 0.1 M NaOH at 90°C (lane at far right), however, shows that such a treatment leaves only 8% of the DNA biotinylated. A portion of the DNA (9%) is also shown to be broken down in size by this treatment. **b:** A reaction scheme for an LC/MS-based scheme for looking at whether biotin tyramide (or a related product) is in fact released from biotinylated DNA (CatG4) and RNA (NRAS) GQs following the hot base treatment. The MS data are shown in Supporting Figure S6.

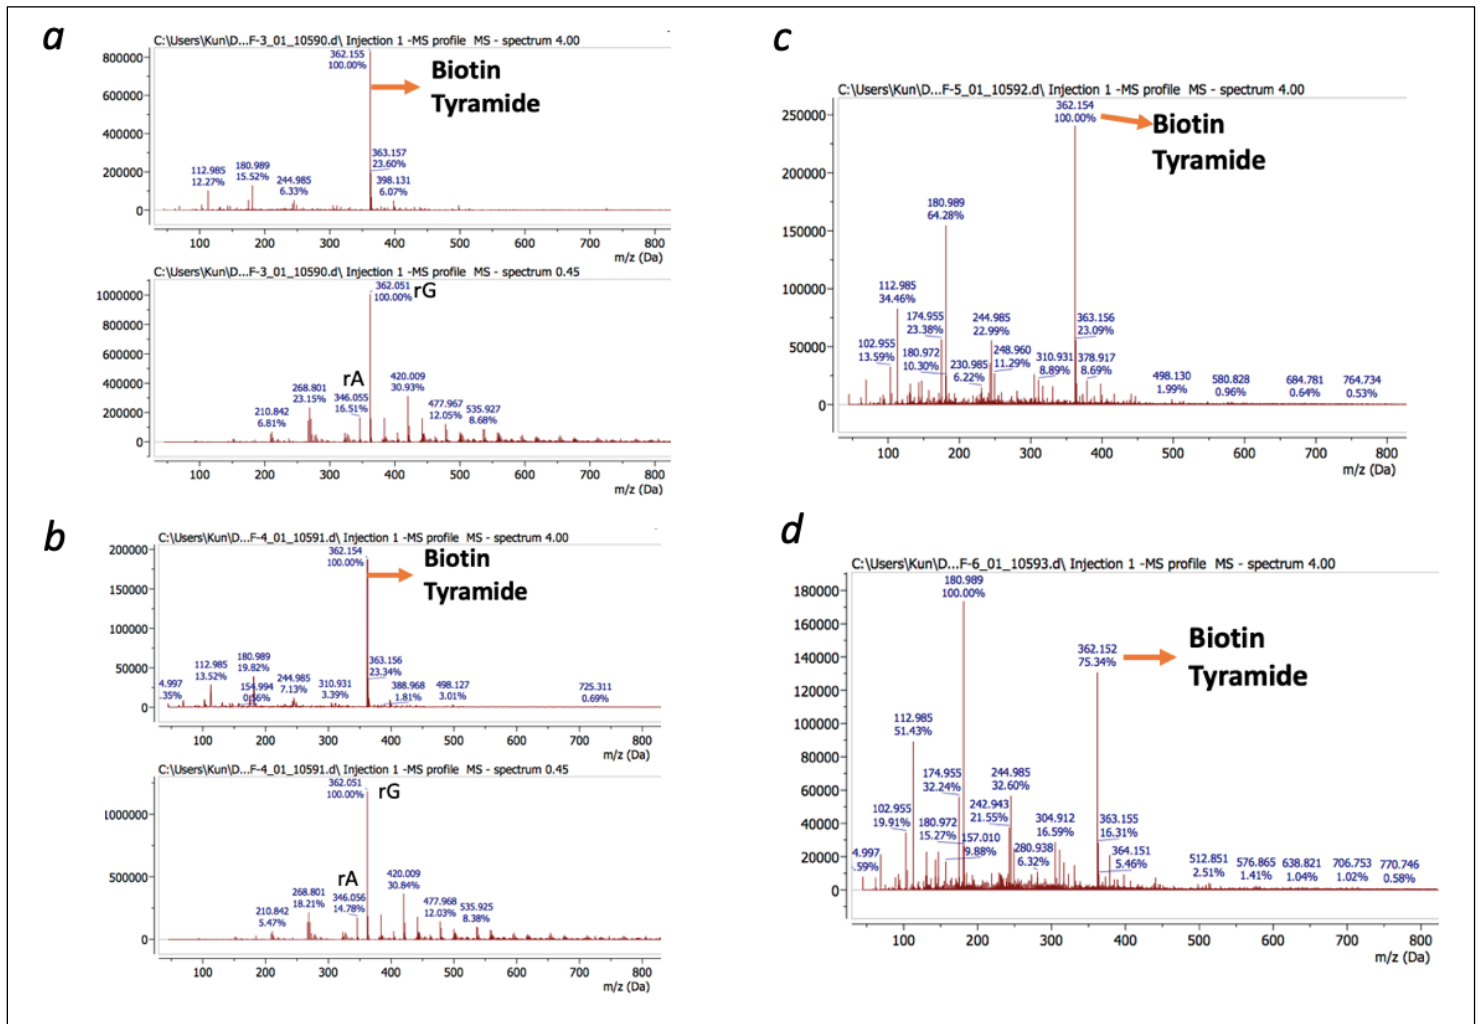

**Supporting Figure S6:** LC-ESI Mass spectrometry analysis of solutions (*a*) “NRAS RNA biotinylation”; (*b*) “NRAS RNA no biotinylation”; (*c*) “CatG4 DNA biotinylation”; (*d*); “CatG4 DNA no biotinylation”. *a* and *b* show both biotin-tyramide mass and abundances, as well as the mass and abundances of rGMP and rAMP generated from alkaline hydrolysis of the NRAS RNA (rCMP and rUMP are very small peaks). *c* and *d* show biotin-tyramide mass and abundances.

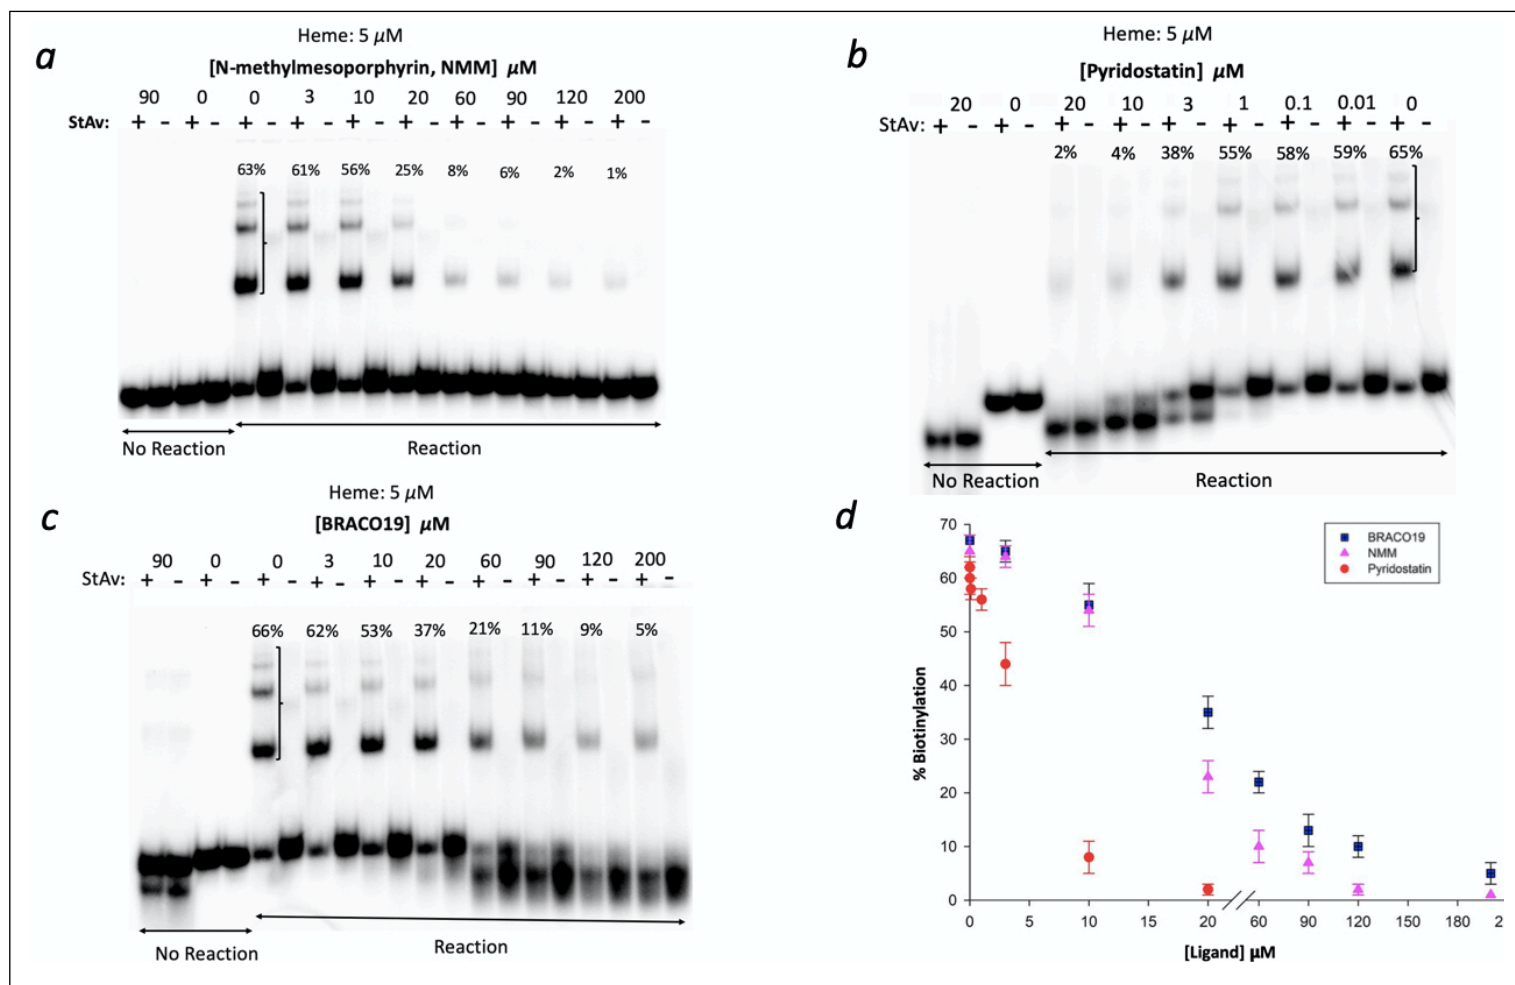

**Supporting Figure S7:** Impact of the titration of three non-heme GQ-binding ligands upon the GQ self-biotinylation reaction. Titration of 0-200  $\mu$ M N-methylmesoporphyrin (NMM) (*a*); 0-20  $\mu$ M Pyridostatin (*b*); and 0-200  $\mu$ M BRACO19 (*c*) to 5  $\mu$ M heme•“CatG4-ext” complex results in gradual abolition of GQ self-biotinylation. In all three panels, the bracket indicates streptavidin (StAv)-retarded DNA species. Panel *d* plots percent GQ biotinylation measured in response to concentration of added ligand (here the data represent quantitation of three independent experiments carried out with each of the GQ-binding ligands, NMM, Pyridostatin, and BRACO19). The error bars indicated represent one standard deviation from the mean.



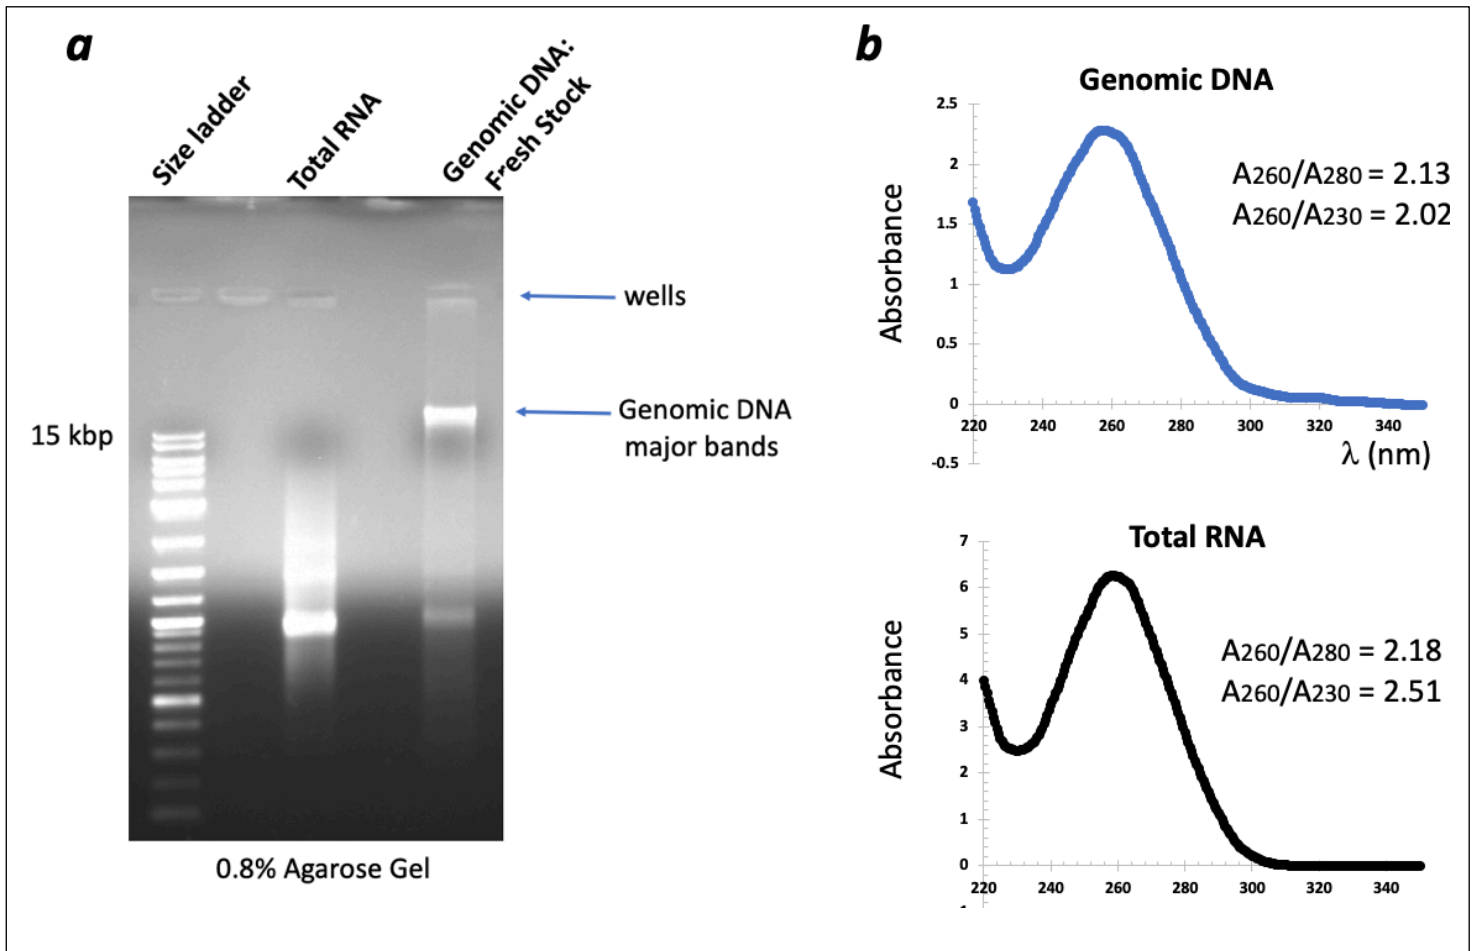

**Supporting Figure S8:** Examination of the purity of biotinylated DNA and RNA extracted using commercial kits from treated *Drosophila* embryo salivary glands. Panel **a**: A 0.8% agarose gel showing (left) total RNA and (right) genomic DNA purified from the glands. Panel **b**: UV-Vis spectra of the purified total RNA and genomic DNA. The  $A_{260}/A_{280}$  ratios, which are  $> 1.8$ , indicate high purities (free of proteins) for both DNA and RNA preparations.

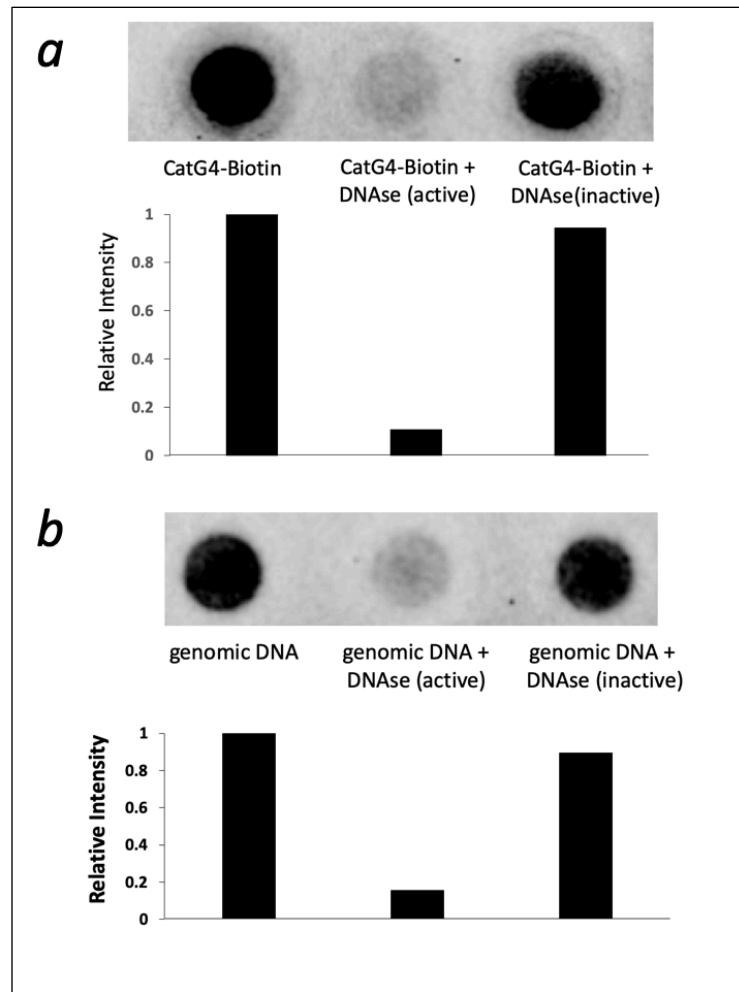

**Supporting Figure S9:** Evidence that the biotin detected, using streptavidin-HRP-generated chemiluminescence output signal, is from biotinylated DNA (and not biotinylated proteins) extracted from treated *Drosophila* embryonic salivary glands. Panel **a**: A chemically biotinylated oligonucleotide (3'-biotinyl CatG4) was used as a positive control, spotted by itself (left); treated with DNAase I (centre); and with heat-deactivated DNAase I (right). Panel **b**: the same analysis as in panel **a**, except on total genomic DNA extracted from *Drosophila* 3<sup>rd</sup> instar larval salivary glands.

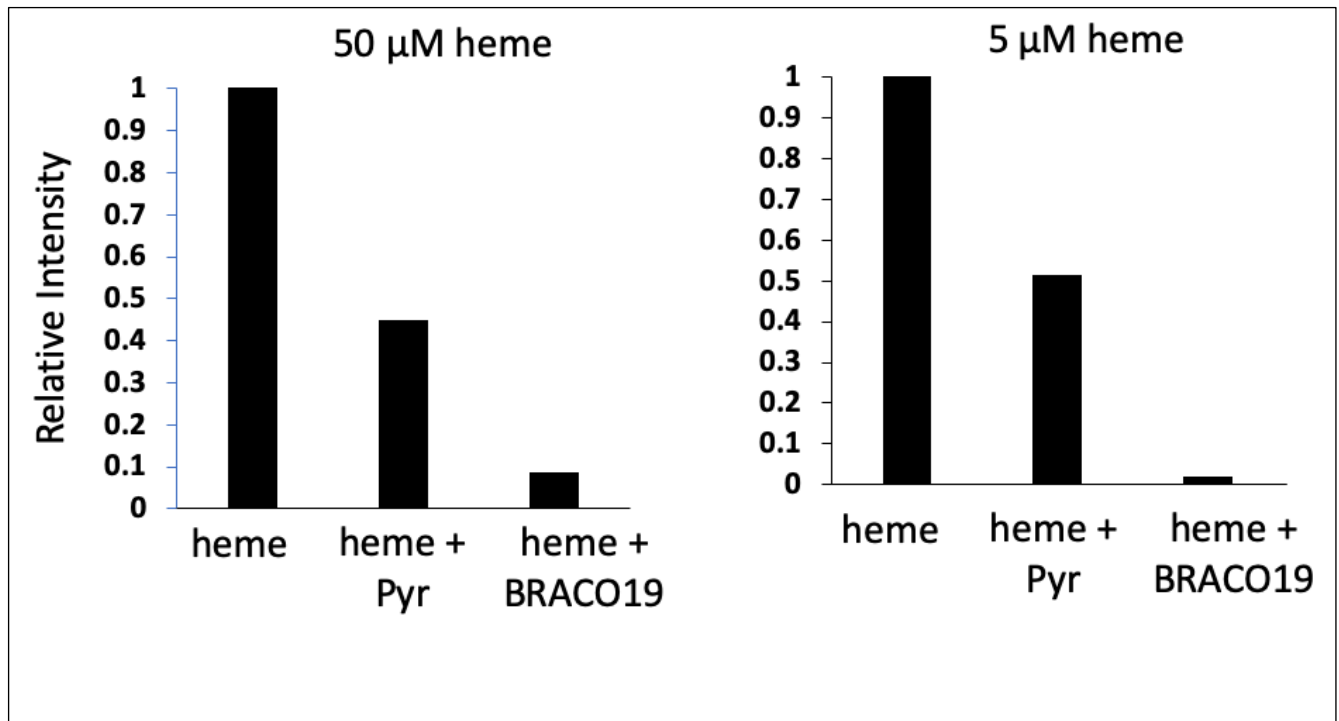

**Supporting Figure S10:** Quantiation of the chemiluminescence output data from the biotinylated total RNA blots shown in **Figure 9d**.
